# Supplementary material for: Photoinduced reversible assembly of polynuclear complexes from Ru-containing ionic liquids with accompanying ionic conductivity modulations
Source: Royal Society of Chemistry journal article supplement (doi:10.1039/d5qi02318a), 2026-01-01
Supplement: d5qi02318a2.pdf [file d5qi02318a2.pdf]

## Supporting Information

### Photoinduced Reversible Assembly of Polynuclear Complexes from Ru-Containing Ionic Liquids with Accompanying Ionic Conductivity Modulations

Haruka Koshino,<sup>a</sup> Masato Shimada,<sup>a</sup> Hiroki Yamada,<sup>b</sup> Kanta Takiishi,<sup>c</sup> Miki Inada,<sup>d</sup> Zi Lang Goo,<sup>e†</sup> Kuniyoshi Sugimoto,<sup>e</sup> Tomoyuki Mochida<sup>\*a,f</sup>

<sup>a</sup>Department of Chemistry, Graduate School of Science, Kobe University, Rokkodai, Nada, Kobe, Hyogo 657-8501, Japan. E-mail: tmochida@platinum.kobe-u.ac.jp

<sup>b</sup>Japan Synchrotron Radiation Research Institute (JASRI), Kouto 1-1-1, Sayo-cho, Sayo-gun, Hyogo 679-5198, Japan

<sup>c</sup>Department of Applied Chemistry, Graduate School of Engineering, Kyushu University, 744 Motoooka, Nishi-ku, Fukuoka, 819-0395, Japan

<sup>d</sup>Department of Applied Chemistry, Faculty of Engineering, Kyushu University, 744 Motoooka, Nishi-ku, Fukuoka, 819-0395, Japan

<sup>e</sup>Department of Chemistry, Faculty of Science and Engineering, Kindai University, 3-4-1 Kowakae, Higashi-osaka, Osaka 577-8502, Japan

<sup>f</sup>Research Center for Membrane and Film Technology, Kobe University, Rokkodai, Nada, Kobe, Hyogo 657-8501, Japan

<sup>†</sup>Present address: Department of Chemistry, Graduate School of Science, The University of Osaka, 1-1, Machikaneyama, Toyonaka, Osaka, 560-0043, Japan

## Contents

**Figure S1.** Photographs of samples sandwiched between quartz plates before and after UV irradiation (365 nm).

**Figure S2.**  $^1\text{H}$  NMR spectra in  $\text{CD}_3\text{CN}$  (left) and FT-IR spectra (right) of (a) **1-B(CN) $_2$** , (b) **1-BEt $_2$ (CN) $_2$** , (c) **1-BF $_2$ (CN) $_2$** , and (d) **2-BF $_2$ (CN) $_2$**  before photoirradiation, after photoirradiation, and after subsequent heating to 393 K.

**Figure S3.**  $^{19}\text{F}$  NMR spectra of **1-BF $_2$ (CN) $_2$**  before (top) and after (bottom) photoirradiation in  $\text{CDCl}_3$ .

**Figure S4.** PDF patterns of (i) **1-B(CN) $_4$**  and (ii) **Bu-B(CN) $_4$**  photoproducts prepared by LED photoirradiation.

**Figure S5.** Optical microscope images of (a) **1-B(CN) $_4$**  and (b) **Bu-B(CN) $_4$**  photoproducts obtained under (i) LED, (ii) deep UV, and (iii) xenon UV light.

**Figure S6.** SEM images of the photoproducts of (a) **1-B(CN) $_4$**  and (b) **Bu-B(CN) $_4$** , obtained by LED photoirradiation.

**Figure S7.** PXRD patterns of **Bu-B(CN) $_4$**  photoproducts obtained under (i) LED, (ii) deep UV, and (iii) xenon UV light, measured using synchrotron radiation at room temperature.

**Figure S8.** Microscopic images of photoproducts sandwiched between quartz plates: (a) **1-BEt $_2$ (CN) $_2$** , (b) **1-BF $_2$ (CN) $_2$** , and (c) **2-BF $_2$ (CN) $_2$** . The right panel in (b) shows the photoproduct of **1-BF $_2$ (CN) $_2$**  after washing with hexane, observed by polarized optical microscopy under crossed Nicols.

**Figure S9.** ESI-MS spectra of acetone solutions of the photoproducts of (a) **1-BEt $_2$ (CN) $_2$** , (b) **1-BF $_2$ (CN) $_2$** , and (c) **2-BF $_2$ (CN) $_2$** .

**Figure S10.**  $^1\text{H}$  NMR spectrum of the photoproducts of **1-BF $_2$ (CN) $_2$**  in  $\text{CDCl}_3$ .

**Figure S11.** (a)  $^1\text{H}$  and (b)  $^{19}\text{F}$  NMR spectra of the photoproduct of **2-BF $_2$ (CN) $_2$**  in acetone- $d_6$ .

**Figure S12.** (a)  $^1\text{H}$  and (b)  $^{19}\text{F}$  NMR spectra in acetone- $d_6$  of crystals obtained by photoirradiation of **3-BF<sub>2</sub>(CN)<sub>2</sub>** in methanol.

**Figure S13.** ESI-MS spectra of the photoproducts of (a) **3-BEt<sub>2</sub>(CN)<sub>2</sub>** obtained by photoirradiation in acetone- $d_6$  and (b) **3-BF<sub>2</sub>(CN)<sub>2</sub>**, whose crystals were obtained by photoirradiation in methanol and subsequently dissolved in acetone.

**Figure S14.** Molecular structures of the cation and anion in  $[\text{CpRu}(\text{C}_6\text{H}_6)][(\text{CpRu})_2\{\text{BF}_2(\text{CN})_2\}_3]$  determined at 100 K. Hydrogen atoms are omitted.

**Figure S15.**  $^1\text{H}$  NMR spectrum ( $\text{CDCl}_3$ ) of the photoproducts obtained from a mixture of **1-B(CN)<sub>4</sub>** and **1-BF<sub>2</sub>(CN)<sub>2</sub>** after 1 h of photoirradiation.

**Figure S16.** DSC curves of **1-B(CN)<sub>4</sub>**.

**Figure S17.** (a)  $^1\text{H}$  and (b)  $^{11}\text{B}$  NMR spectra of **3-BEt<sub>2</sub>(CN)<sub>2</sub>** in  $\text{CD}_3\text{CN}$ .

**Figure S18.** (a)  $^1\text{H}$ , (b)  $^{11}\text{B}$ , and (c)  $^{19}\text{F}$  NMR spectra of **3-BF<sub>2</sub>(CN)<sub>2</sub>** in  $\text{CD}_3\text{CN}$ .

**Figure S19.** (a)  $^1\text{H}$  and (b)  $^{19}\text{F}$  NMR spectra of the photoproduct of **2-BF<sub>2</sub>(CN)<sub>2</sub>** in acetone- $d_6$ .

**Table S1.** Crystallographic parameters for  $[\text{CpRu}(\text{C}_6\text{H}_6)][(\text{CpRu})_2\{\text{BF}_2(\text{CN})_2\}_3]$

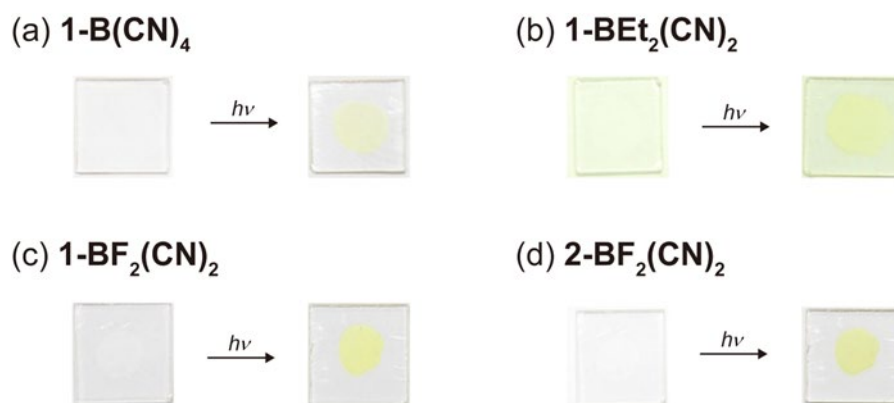

**Figure S1.** Photographs of samples sandwiched between quartz plates before and after UV irradiation (365 nm).

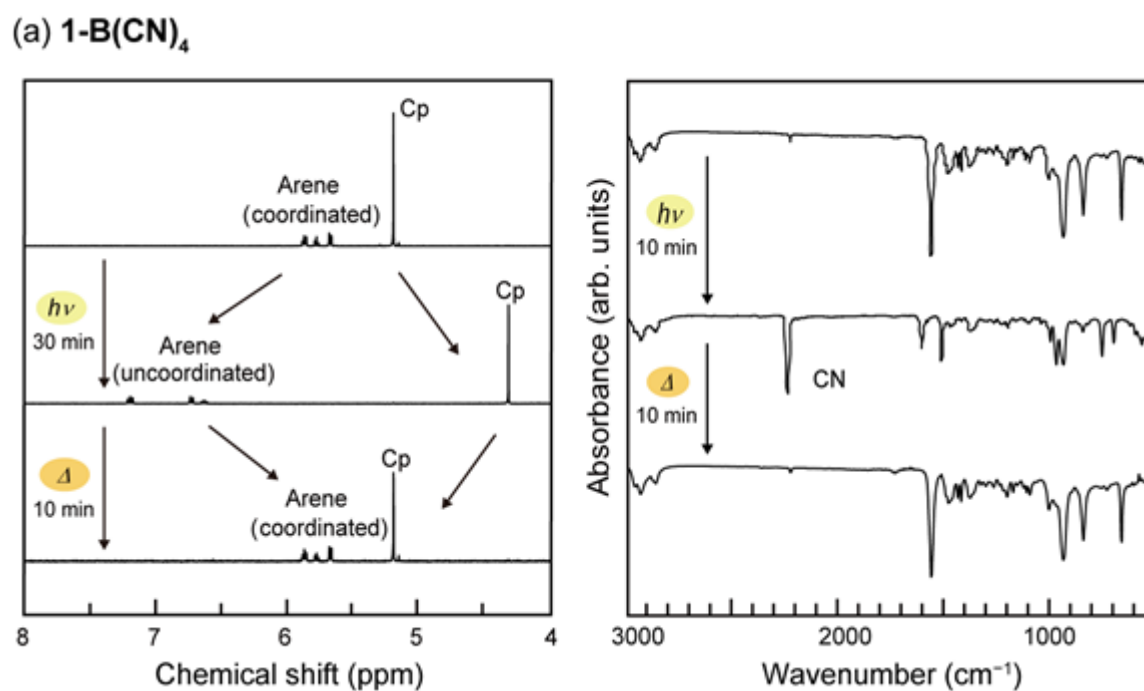

**Figure S2.**  $^1\text{H}$  NMR spectra in  $\text{CD}_3\text{CN}$  (left) and FT-IR spectra (right) of (a)  $1-\text{B}(\text{CN})_2$ , (b)  $1-\text{BEt}_2(\text{CN})_2$ , (c)  $1-\text{BF}_2(\text{CN})_2$ , and (d)  $2-\text{BF}_2(\text{CN})_2$  before photoirradiation, after photoirradiation, and after subsequent heating to 393 K.

(b)  $1\text{-BEt}_2(\text{CN})_2$

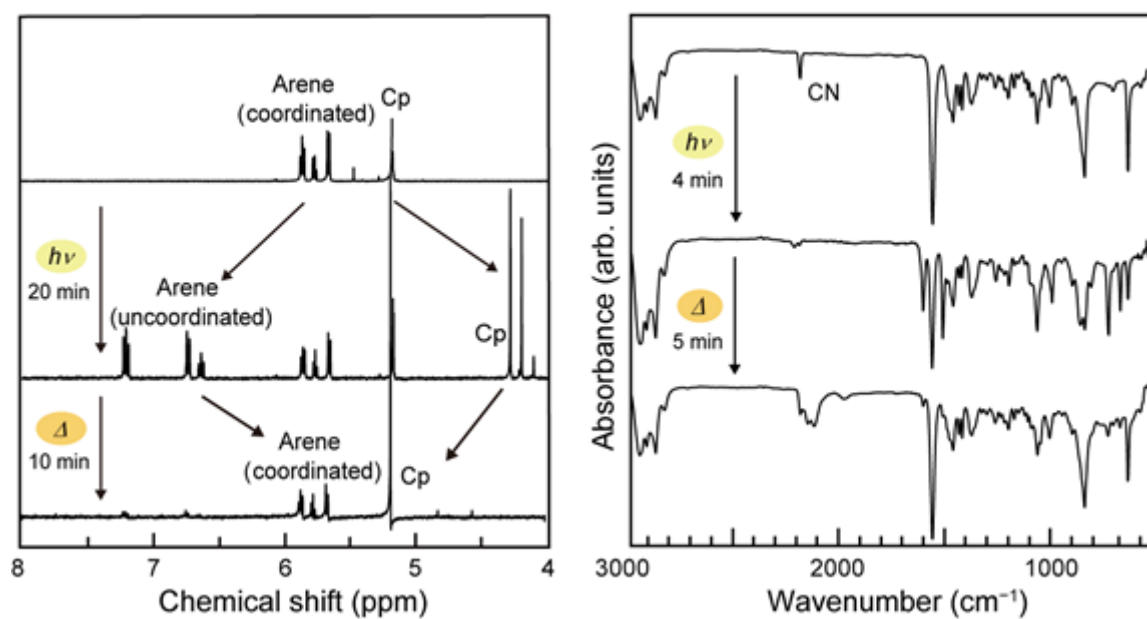

(c)  $1\text{-BF}_2(\text{CN})_2$

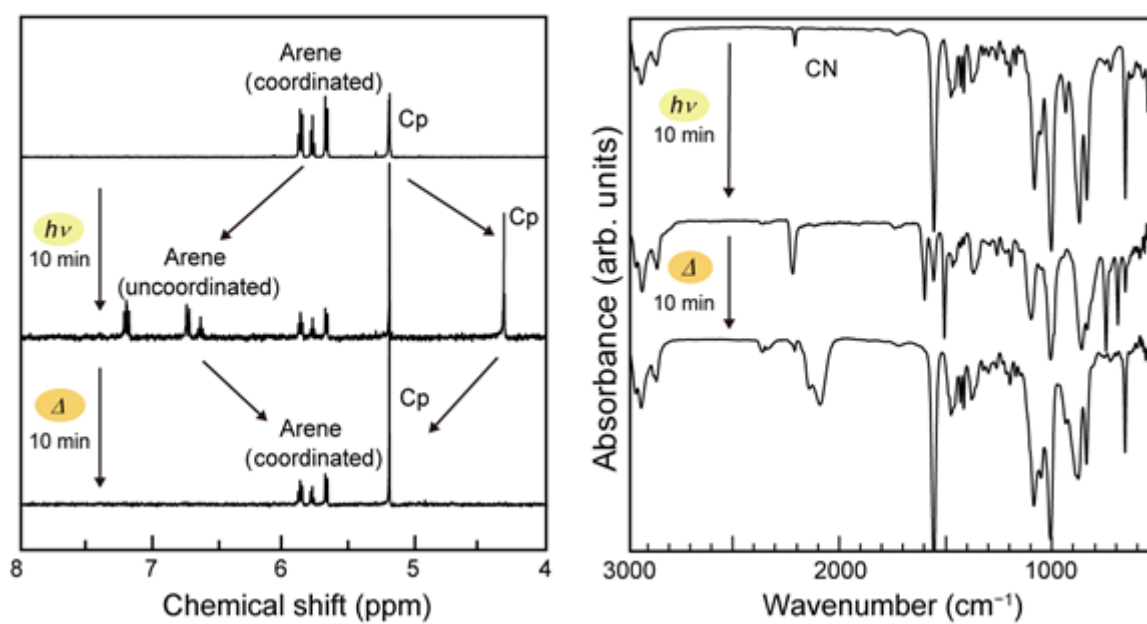

Figure S2. (Continued)

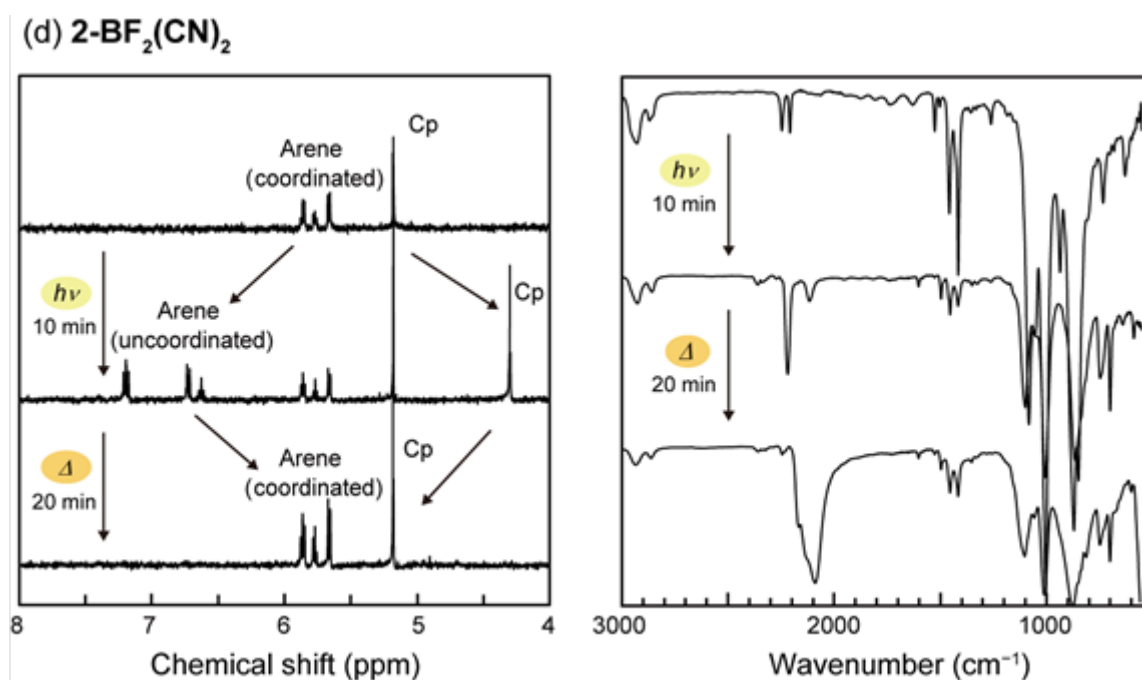

**Figure S2.** (Continued)

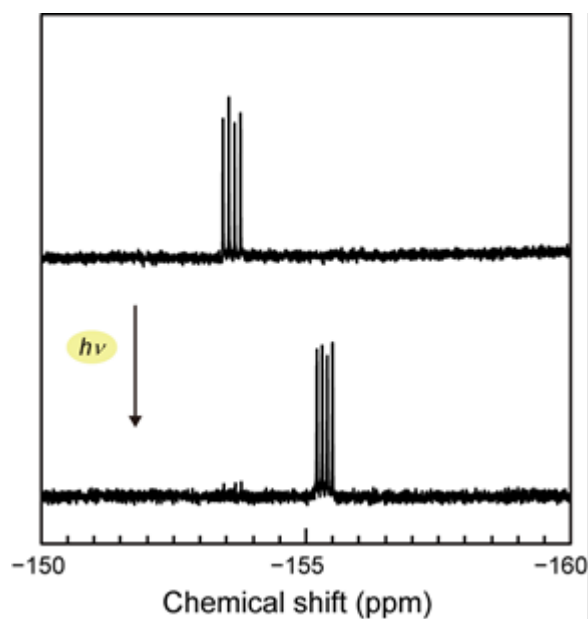

**Figure S3.**  $^{19}\text{F}$  NMR spectra of  $1\text{-BF}_2(\text{CN})_2$  before (top) and after (bottom) photoirradiation in  $\text{CDCl}_3$ .

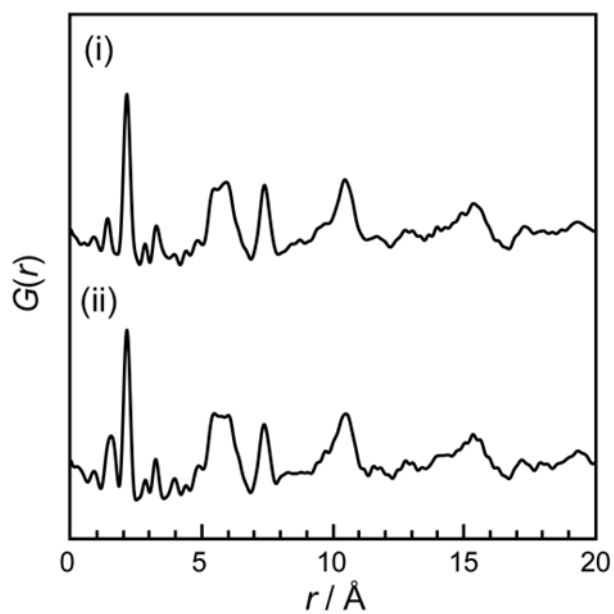

**Figure S4.** PDF patterns of (i) **1-B(CN)<sub>4</sub>** and (ii) **Bu-B(CN)<sub>4</sub>** photoproducts prepared by LED photoirradiation.

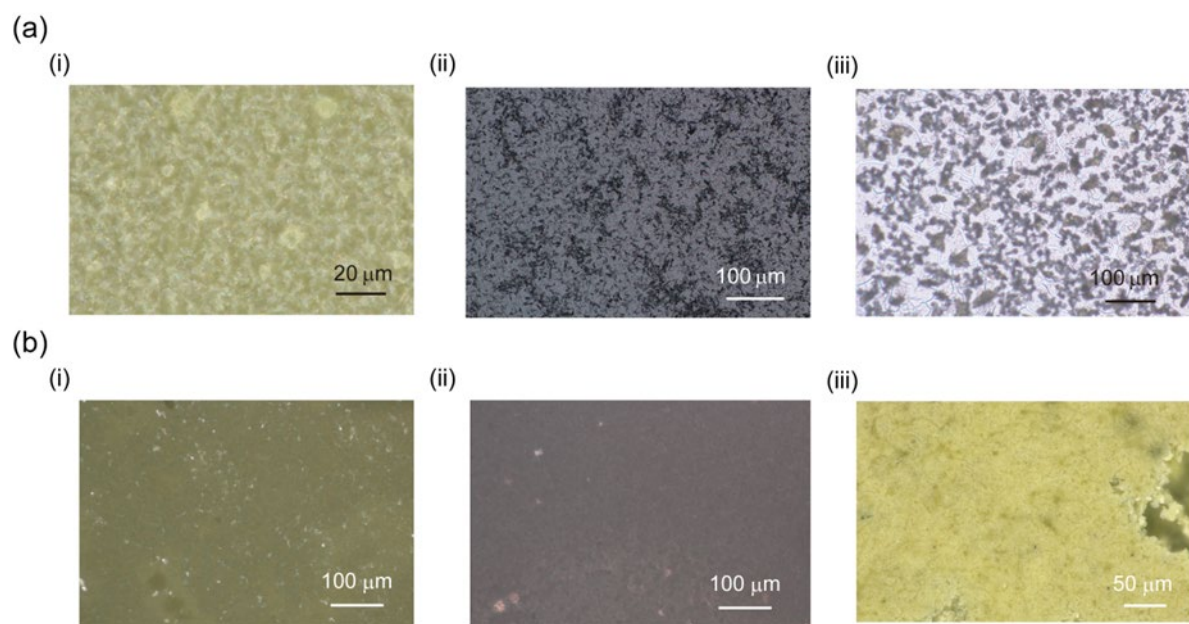

**Figure S5.** Optical microscope images of (a) **1-B(CN)<sub>4</sub>** and (b) **Bu-B(CN)<sub>4</sub>** photoproducts obtained under (i) LED, (ii) deep UV, and (iii) xenon UV light.

(a) **1-B(CN)<sub>4</sub>**

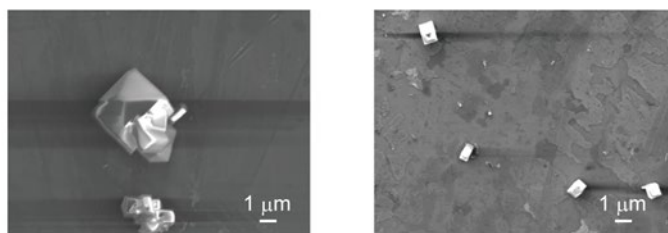

(b) **Bu-B(CN)<sub>4</sub>**

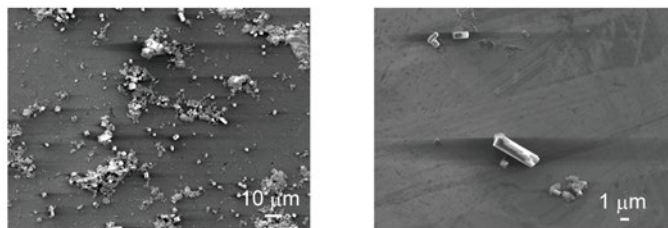

**Figure S6.** SEM images of the photoproducts of (a) **1-B(CN)<sub>4</sub>** and (b) **Bu-B(CN)<sub>4</sub>**, obtained by LED photoirradiation.

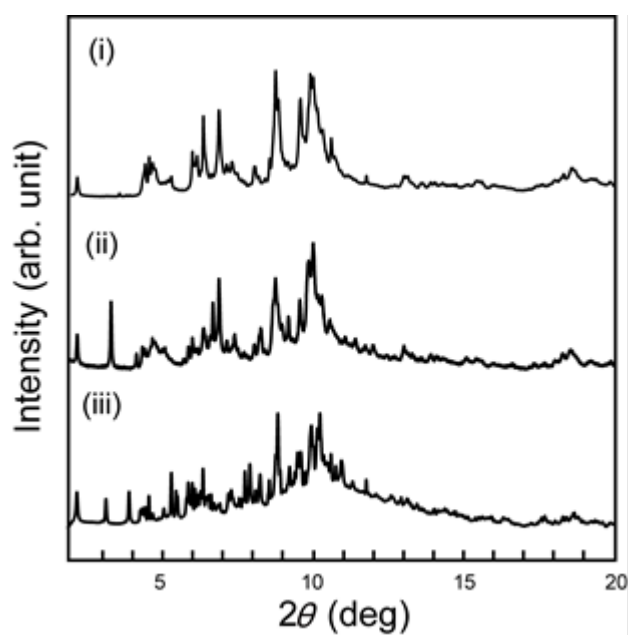

**Figure S7.** PXRD patterns of **Bu-B(CN)<sub>4</sub>** photoproducts obtained under (i) LED, (ii) deep UV, and (iii) xenon UV light, measured using synchrotron radiation at room temperature.



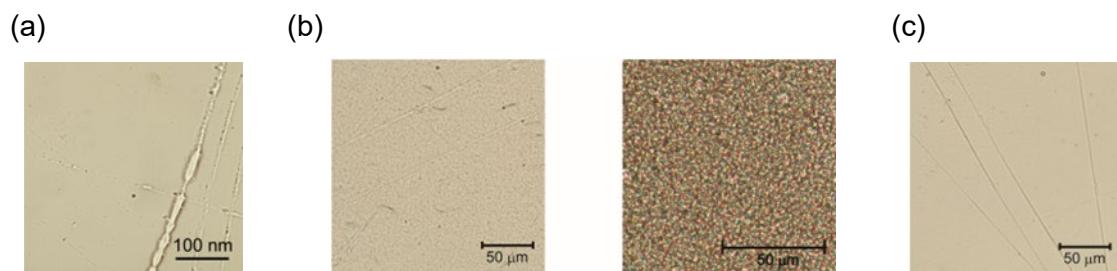

**Figure S8.** Microscopic images of photoproducts sandwiched between quartz plates: (a) **1-BEt<sub>2</sub>(CN)<sub>2</sub>**, (b) **1-BF<sub>2</sub>(CN)<sub>2</sub>**, and (c) **2-BF<sub>2</sub>(CN)<sub>2</sub>**. The right panel in (b) shows the photoproduct of **1-BF<sub>2</sub>(CN)<sub>2</sub>** after washing with hexane, observed by polarized optical microscopy under crossed Nicols.

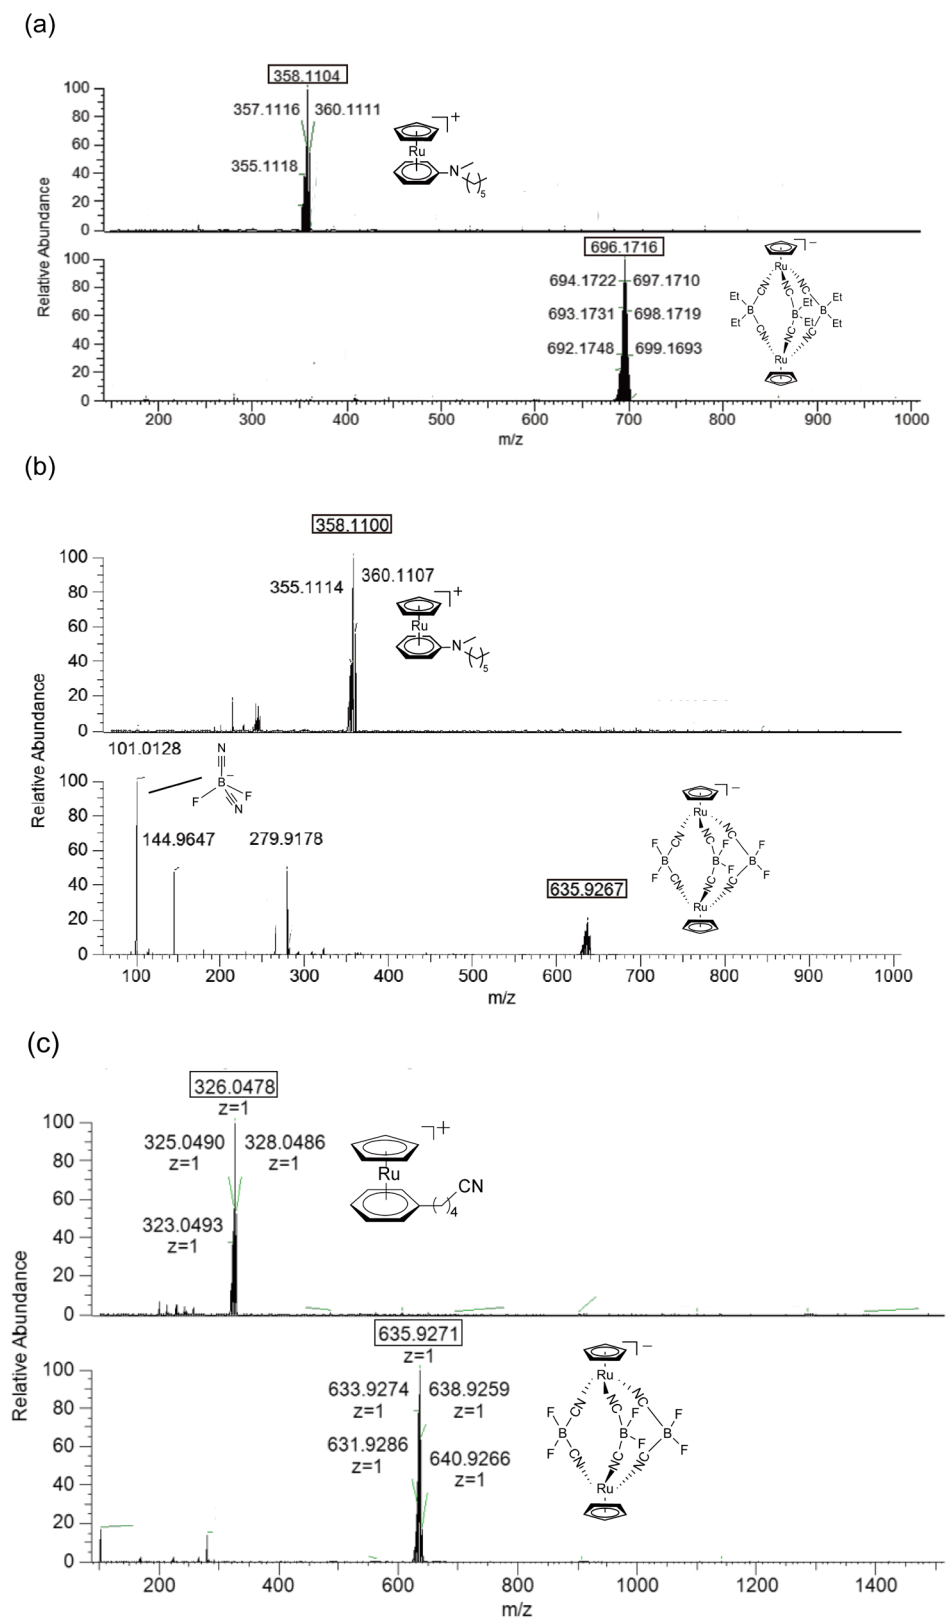

**Figure S9.** ESI-MS spectra of acetone solutions of the photoproducts of (a) **1-BEt<sub>2</sub>(CN)<sub>2</sub>**, (b) **1-BF<sub>2</sub>(CN)<sub>2</sub>**, and (c) **2-BF<sub>2</sub>(CN)<sub>2</sub>**.

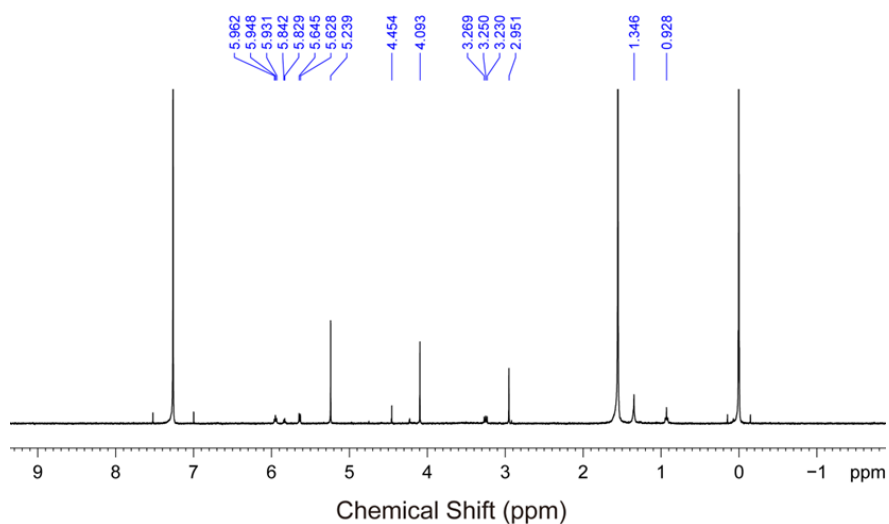

**Figure S10.**  $^1\text{H}$  NMR spectrum of the photoproducts of **1-BF<sub>2</sub>(CN)<sub>2</sub>** in  $\text{CDCl}_3$ .

(a)

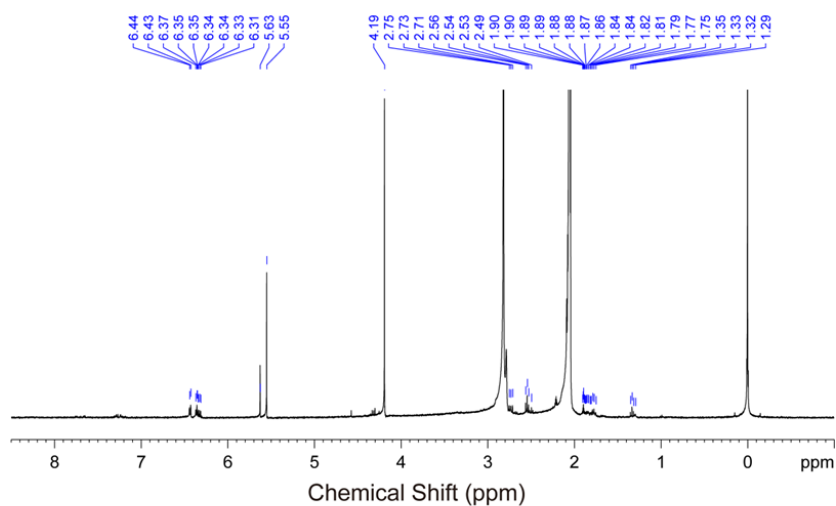

(b)

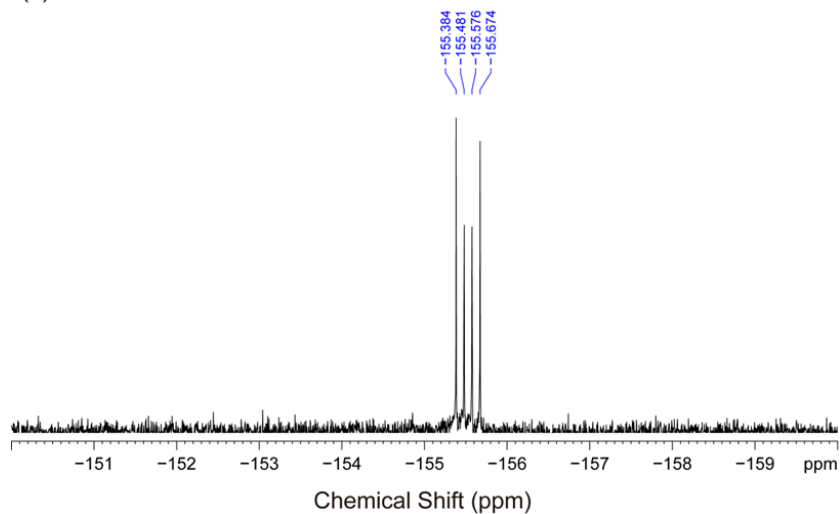

**Figure S11.** (a)  $^1\text{H}$  and (b)  $^{19}\text{F}$  NMR spectra of the photoproduct of **2-BF<sub>2</sub>(CN)<sub>2</sub>** in  $\text{acetone-}d_6$ .

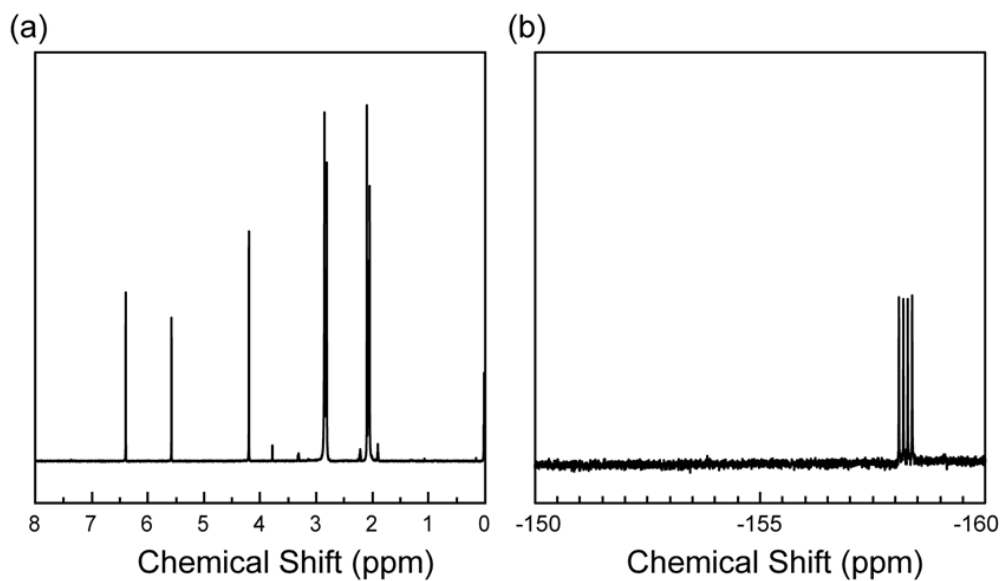

**Figure S12.** (a)  $^1\text{H}$  and (b)  $^{19}\text{F}$  NMR spectra in acetone- $d_6$  of crystals obtained by photoirradiation of **3-BF<sub>2</sub>(CN)<sub>2</sub>** in methanol.

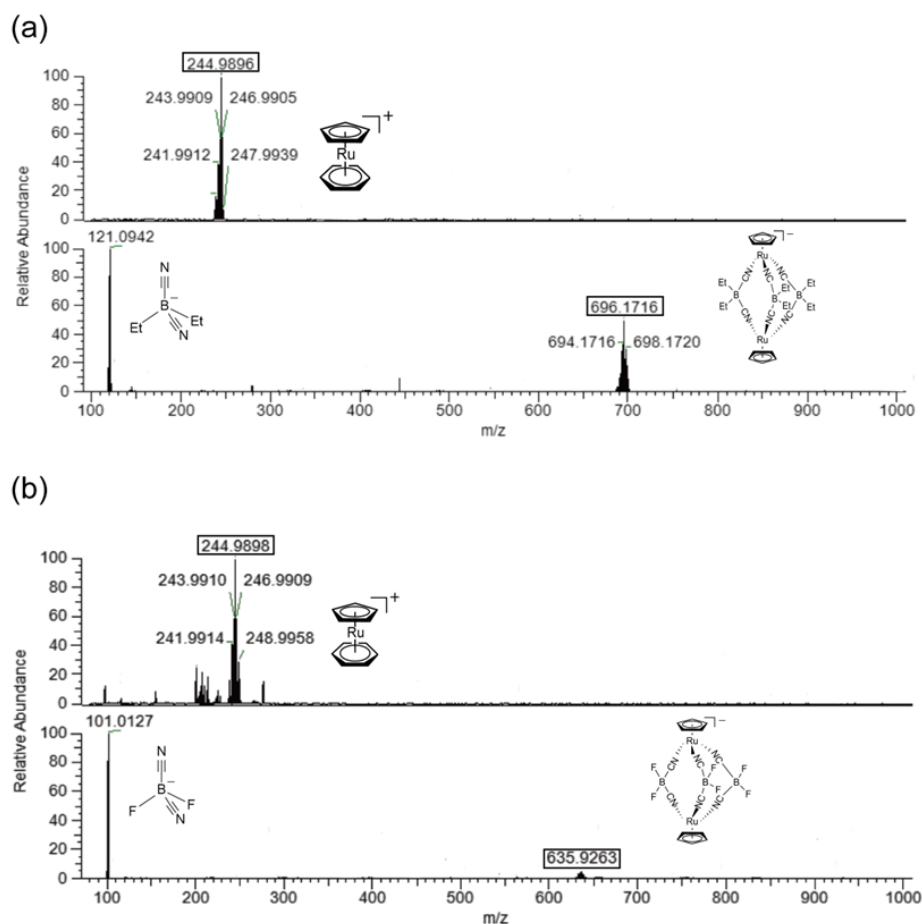

**Figure S13.** ESI-MS spectra of the photoproducts of (a) **3-BEt<sub>2</sub>(CN)<sub>2</sub>** obtained by photoirradiation in acetone- $d_6$  and (b) **3-BF<sub>2</sub>(CN)<sub>2</sub>**, whose crystals were obtained by photoirradiation in methanol and subsequently dissolved in acetone.

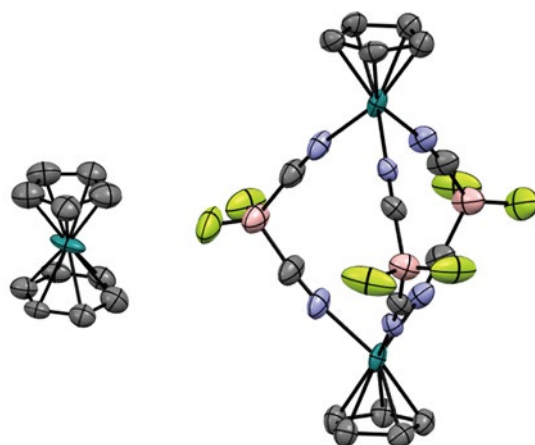

**Figure S14.** Molecular structures of the cation and anion in  $[\text{CpRu}(\text{C}_6\text{H}_6)][(\text{CpRu})_2\{\text{BF}_2(\text{CN})_2\}_3]$  determined at 100 K. Hydrogen atoms are omitted.

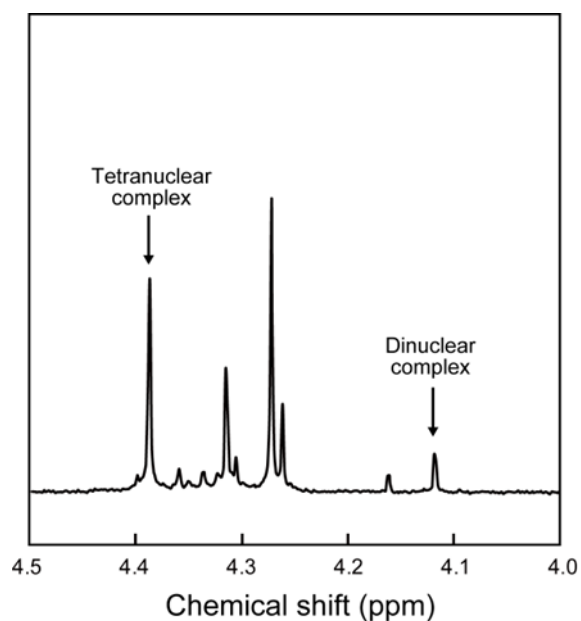

**Figure S15.**  $^1\text{H}$  NMR spectrum ( $\text{CDCl}_3$ ) of the photoproducts obtained from a mixture of **1**- $\text{B}(\text{CN})_4$  and **1**- $\text{BF}_2(\text{CN})_2$  after 1 h of photoirradiation.

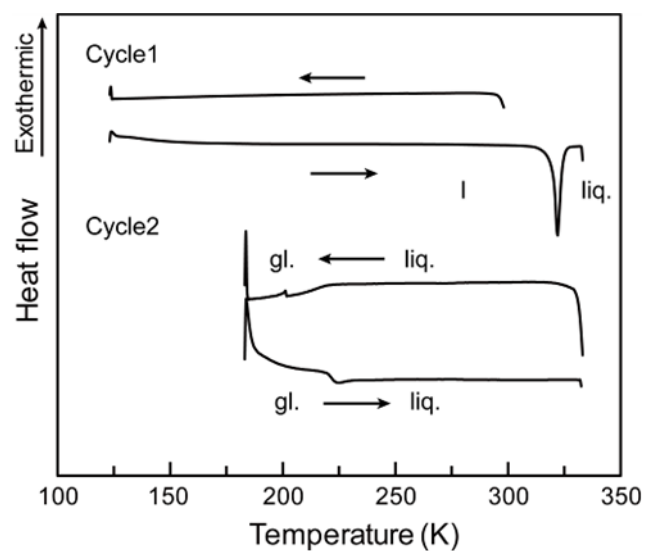

**Figure S16.** DSC curves of **1-B(CN)<sub>4</sub>**.

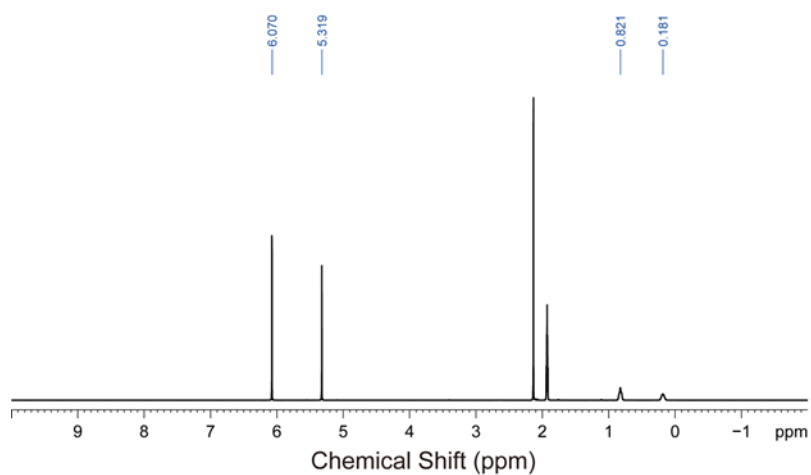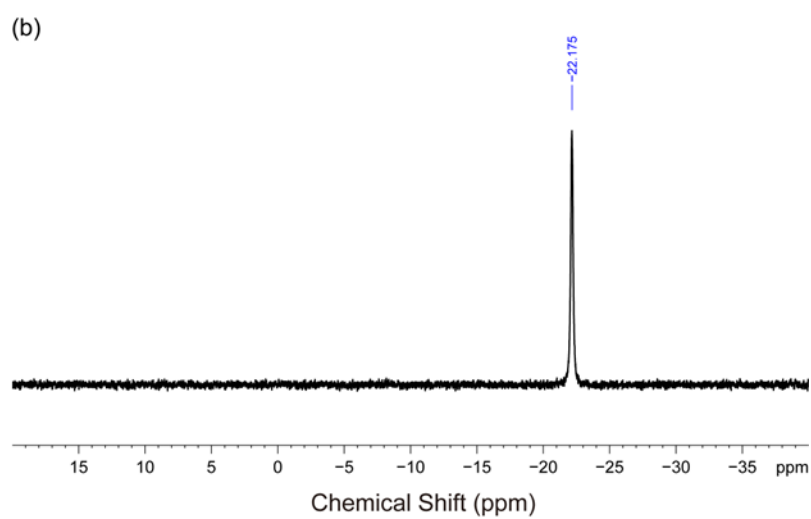

**Figure S17.** (a)  $^1\text{H}$  and (b)  $^{11}\text{B}$  NMR spectra of **3-BEt<sub>2</sub>(CN)<sub>2</sub>** in  $\text{CD}_3\text{CN}$ .

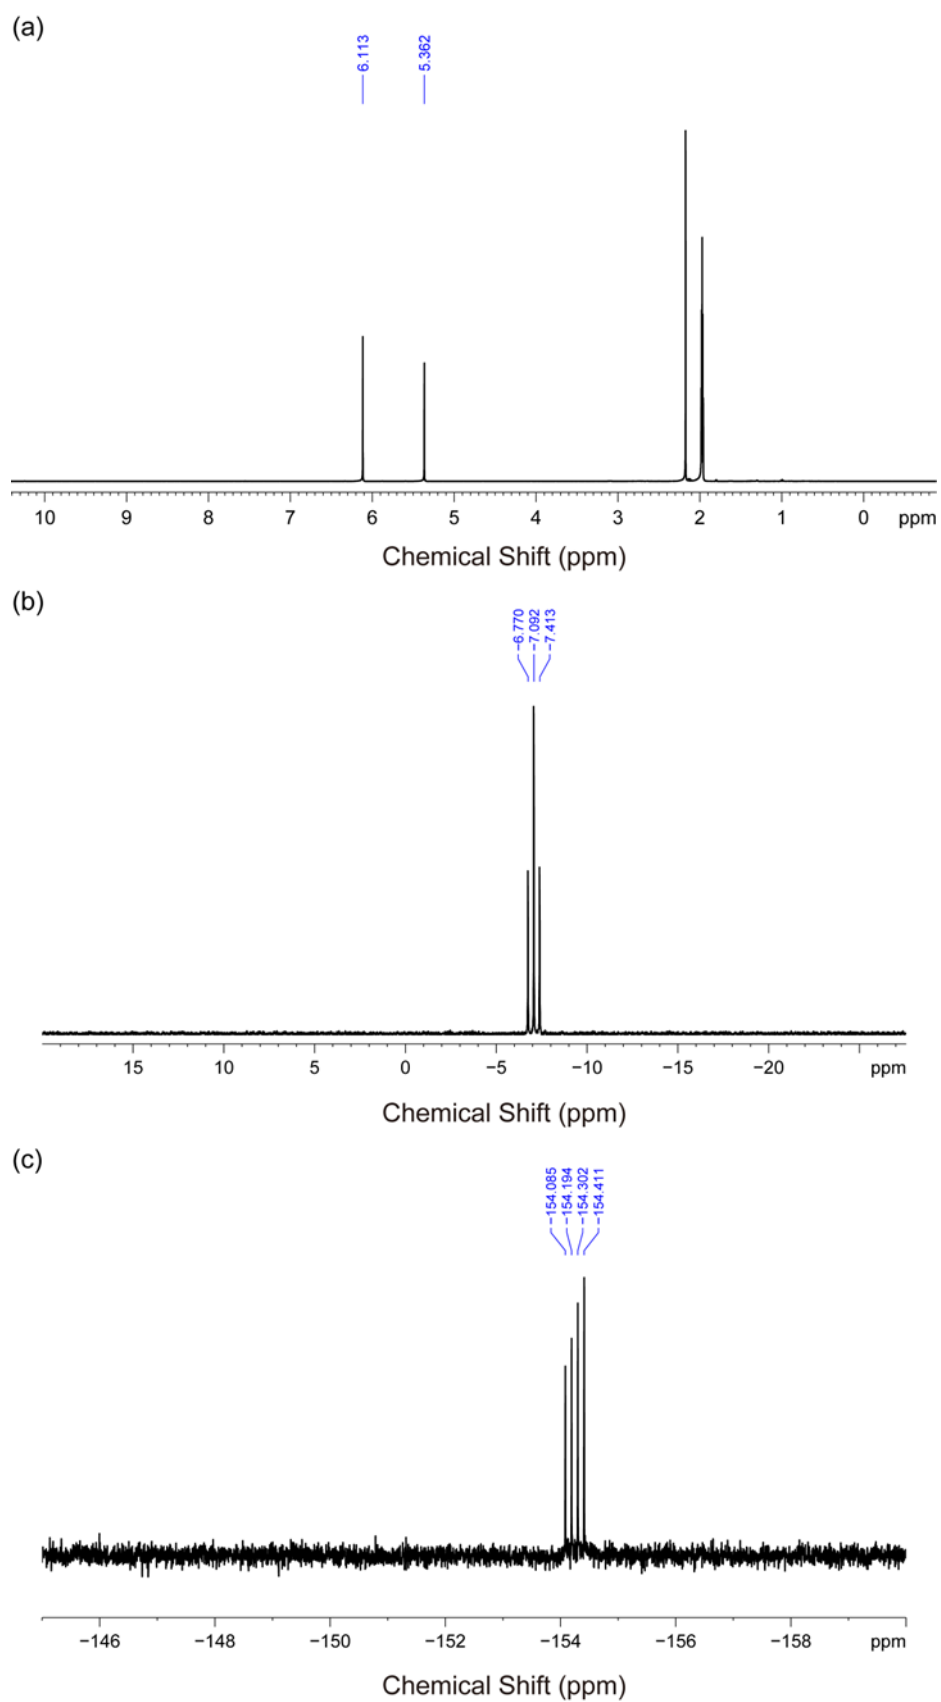

**Figure S18.** (a)  $^1\text{H}$ , (b)  $^{11}\text{B}$ , and (c)  $^{19}\text{F}$  NMR spectra of **3-BF<sub>2</sub>(CN)<sub>2</sub>** in  $\text{CD}_3\text{CN}$ .

**Table S1.** Crystallographic parameters for  
[CpRu(C<sub>6</sub>H<sub>6</sub>)][(CpRu)<sub>2</sub>{BF<sub>2</sub>(CN)<sub>2</sub>}]<sub>3</sub><sup>a</sup>

|                                                                         |                                                                                                |
|-------------------------------------------------------------------------|------------------------------------------------------------------------------------------------|
| Empirical formula                                                       | C <sub>81</sub> H <sub>63</sub> B <sub>9</sub> F <sub>18</sub> N <sub>18</sub> Ru <sub>9</sub> |
| Formula weight                                                          | 2637.41                                                                                        |
| Crystal system                                                          | Monoclinic                                                                                     |
| Space group                                                             | <i>I</i> 2/ <i>a</i>                                                                           |
| <i>a</i> [Å]                                                            | 16.5027(3)                                                                                     |
| <i>b</i> [Å]                                                            | 31.2640(7)                                                                                     |
| <i>c</i> [Å]                                                            | 19.0958(4)                                                                                     |
| <i>b</i> [°]                                                            | 109.534(2)                                                                                     |
| <i>V</i> [Å <sup>3</sup> ]                                              | 9285.2(3)                                                                                      |
| <i>Z</i>                                                                | 4                                                                                              |
| Temperature [K]                                                         | 100                                                                                            |
| <sup>a</sup> Refinement not satisfactory owing to<br>extensive disorder |                                                                                                |
